# Supplementary material
Source: publisher figshare collection journal article supplement (https://asha.figshare.com/articles/dataset/_/25044125)
Supplement: Supplementary file 2 [file 1]

## **Supplemental Material S1. Structure of the interview guide for speech-language pathologists.**

---

### **Rapport building**

1. Can you tell me about your role working with children who use aided AAC?
2. What are the biggest priorities or goals that you have for children who use aided AAC related to their communication?
3. In what ways have you been impacted by the COVID-19 pandemic? What has this looked like day-to-day for you?

### **Section 1: AAC services during the COVID-19 pandemic**

4. What have been the biggest changes that have come from the COVID-19 pandemic in how you provide communication services?
5. What is going well for you right now related to serving children who use aided AAC and their families?
6. What is challenging for you right now related to serving children who use aided AAC and their families?
7. What kind of impact do you see services having right now on the communication of children you serve who use aided AAC, given the COVID-19 pandemic?

### **Section 2: Family-SLP partnership**

8. How do you interact with the parents/caregivers of the children that you serve? What changes, if any have come as a result of the pandemic?
9. How do you see your role in supporting children's communication? How do you see the role of children's parents/caregivers?
10. To what extent have these roles changed or stayed the same as a result of the COVID-19 pandemic?

### **Section 3: Barriers and facilitators to family-SLP partnership**

11. What challenges do you experience related to building strong collaborative relationships with parents of children who use aided AAC?
12. What would make collaborating with families easier or more effective?
13. What advice would you give to service providers of children who use aided AAC about working well with parents, both during crisis situations like the pandemic and day-to-day under typical circumstances?

### **Closing**

14. Is there anything else you want to share about your experiences working with families?

---

*Note.* AAC = augmentative and alternative communication.
